# Supplementary material for: Structure and performance of a V2O5–WO3/TiO2–SiO2 catalyst derived from blast furnace slag (BFS) for DeNOx
Source: Royal Society of Chemistry journal article supplement (doi:10.1039/c7ra01252g), 2017-01-01
Supplement: c7ra01252g1.pdf [file c7ra01252g1.pdf]

## Electronic Supplementary Information

### Structure and performance of $V_2O_5$ - $WO_3$ / $TiO_2$ - $SiO_2$ catalyst derived from blast furnace slag (BFS) for $DeNO_x$

Tuyet-Suong Tran, Jian Yu, Changming Li, Feng Guo, Yusheng Zhang, Guangwen Xu

#### 1. Preparation of mesoporous $TiO_2$ - $SiO_2$ supports

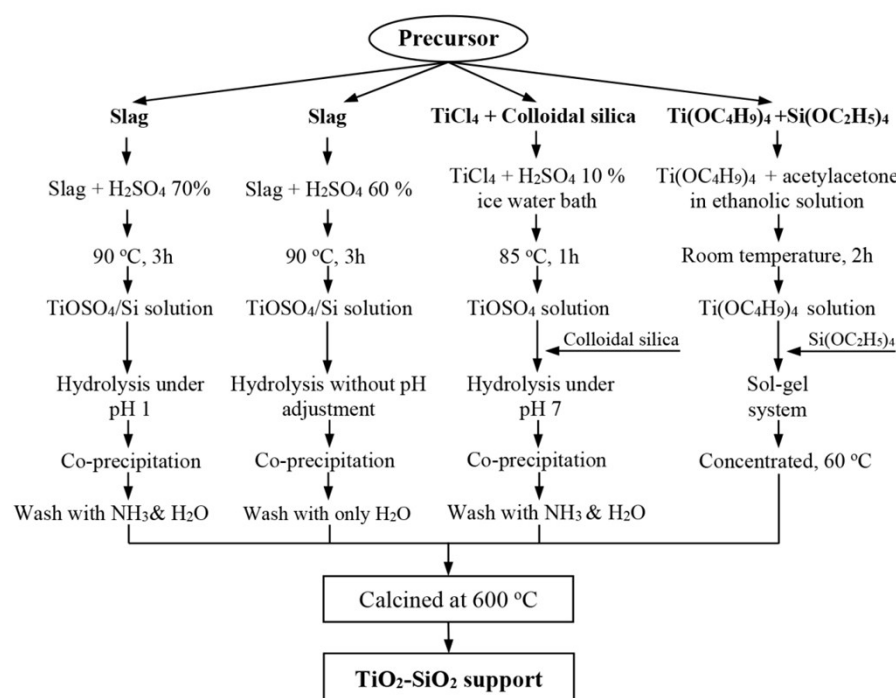

**Figure S1.** A schematic presentation of different technical routes for preparing  $TiO_2$ - $SiO_2$  supports.

The first support denoted as S-BFS-1 was prepared from blast furnace slag (BFS) by, in succession, digesting the slag in 70 wt.%  $H_2SO_4$  at 90 °C for 3 h, hydrolyzing the resulting solution containing  $TiOSO_4/Si$  at  $pH=1$  and 110 °C for 5 h, washing the obtained  $H_2TiO_3$  slurry using  $H_2O$ , then aqueous  $NH_3$  (10 wt.%) and further  $H_2O$ , and finally drying the filter cake to obtain the  $TiO_2$ - $SiO_2$  support. The second BFS-based support with different amounts of  $Al_2O_3/Fe_2O_3/SO_4^{2-}$  dopants (S-BFS-2) was obtained via a similar procedure but its slag digestion used 60 wt.% of  $H_2SO_4$ , hydrolysis did not have any  $pH$  adjustment, and slurry washing to  $pH=7$  used only distilled water.

For catalytic activity comparison, commercial  $Ti$  and  $Si$  precursors were also used to

synthesize  $\text{TiO}_2\text{-SiO}_2$  by co-precipitation and sol-gel methods.  $\text{TiCl}_4$  and colloidal silica were employed to get S-CP- $\text{TiCl}_4$  by co-precipitation method. A certain amount of  $\text{TiCl}_4$  solution was slowly added to a solution of 10 wt.%  $\text{H}_2\text{SO}_4$  at 0 °C in an ice-water bath with vigorously stirring. The mole ratio of  $\text{H}_2\text{SO}_4$  to  $\text{TiCl}_4$  was maintained at 4.0. A grey solution that was formed after about half an hour, was heated to 60 °C to get a clear solution. Then colloidal silica was introduced into the clear solution and kept there for 1 h. Later, aqueous  $\text{NH}_3\cdot\text{H}_2\text{O}$  was added drop by drop to the solution until the pH value reached about 7 and the color of the solution changed to white. At last, the white solution was aged for 12 hours and the resulting precipitate was filtered, washed using distilled water and aqueous  $\text{NH}_3$ , and finally dried at 110 °C. For  $\text{TiO}_2\text{-SiO}_2$  prepared by sol-gel method from  $\text{Ti}(\text{OC}_4\text{H}_9)_4$  and  $\text{Si}(\text{OC}_2\text{H}_5)_4$  precursors, the procedure goes as follows: firstly  $\text{Ti}(\text{OC}_4\text{H}_9)_4$  was stabilized by adding acetylacetonate ( $\text{C}_5\text{H}_8\text{O}_2$ ) and the solution was diluted with ethanolic solution, with some  $\text{Si}(\text{OC}_2\text{H}_5)_4$  added at last. After stirring for 2 h at room temperature, the sol was concentrated at 60 °C and subsequently dried at 110 °C to obtain S-SG-Organic. Finally, all prepared samples having the similar  $\text{SiO}_2$  content (about 9.3 wt.%) were calcined at 600 °C for 4 h in air to obtain the  $\text{TiO}_2\text{-SiO}_2$  supports for tests.

## 2. HR-TEM and SEM-EDS images for $\text{V}_2\text{O}_5\text{-WO}_3/\text{TiO}_2\text{-SiO}_2$ catalysts

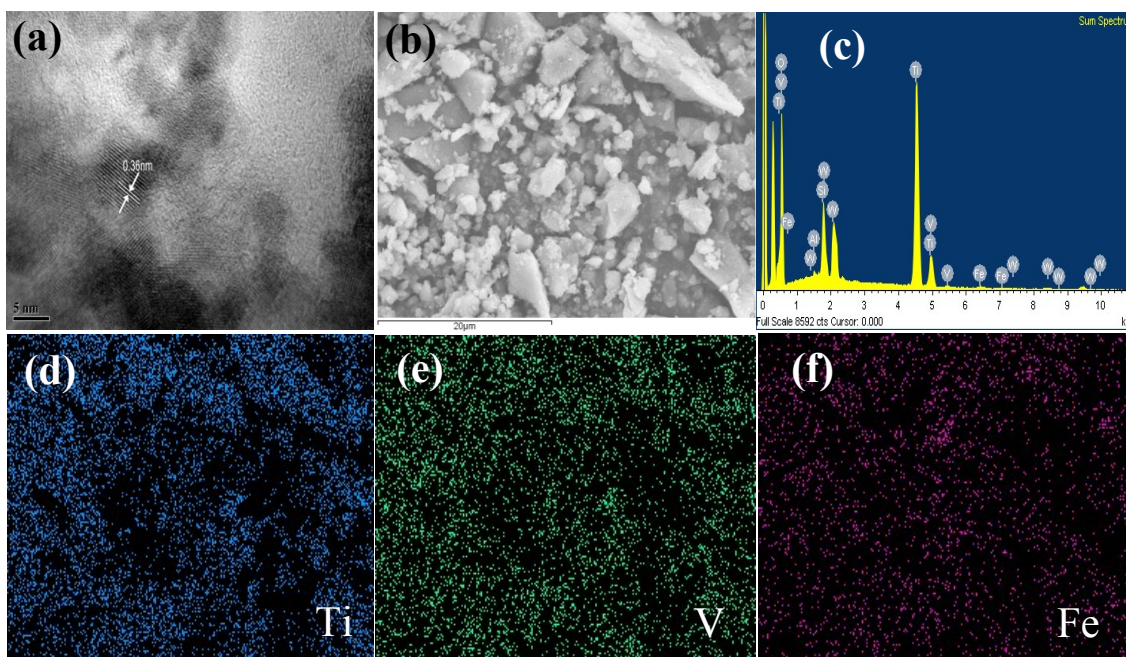

**Figure S2.** (a) HR-TEM image, (b) SEM image, (c) EDS spectra, and (d-f) EDS mapping of Ti, V and Fe elements for BFS-1 catalyst.

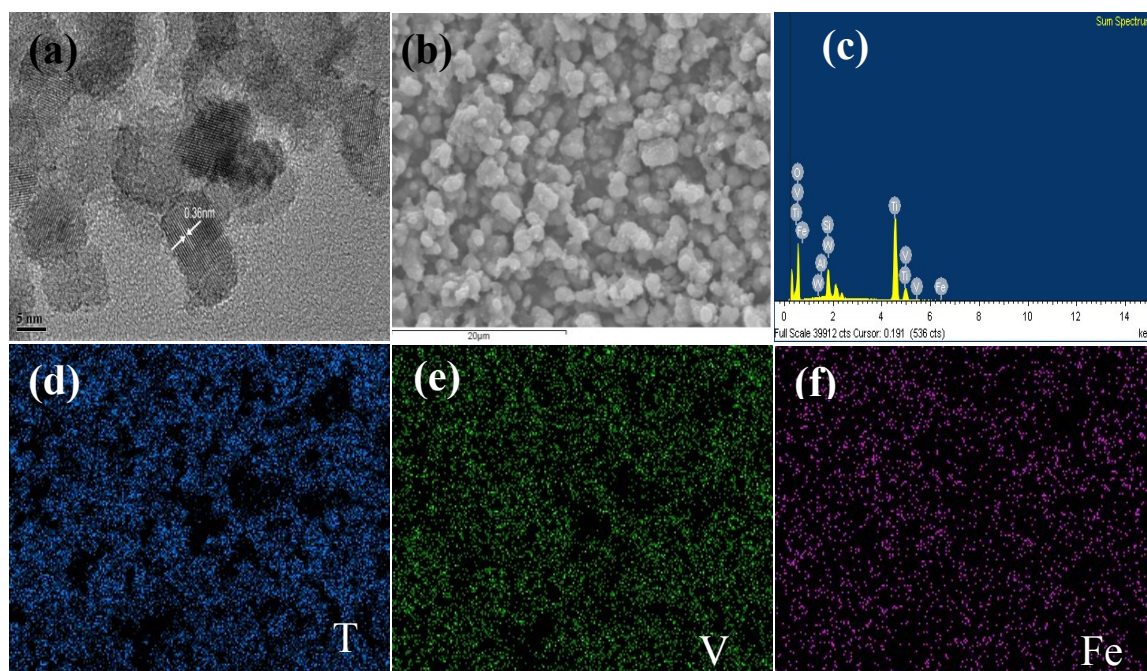

**Figure S3.** (a) HR-TEM image, (b) SEM image, (c) EDS spectra, and (d-f) EDS mapping of Ti, V and Fe elements for BFS-2 catalyst.

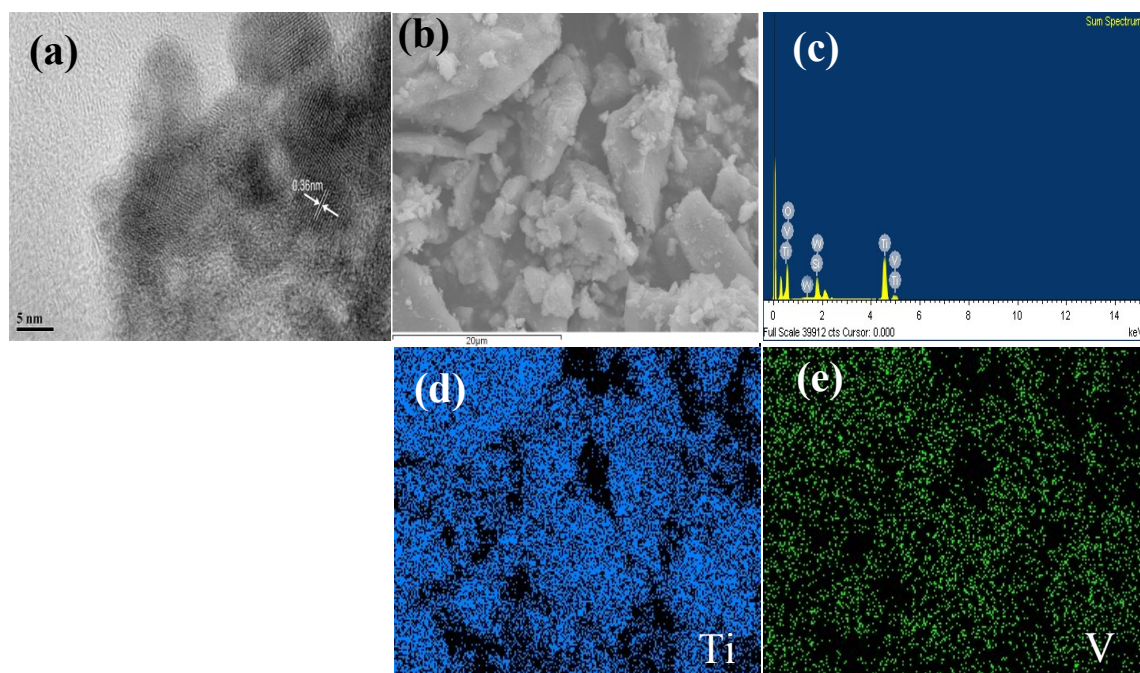

**Figure S4.** (a) HR-TEM image, (b) SEM image, (c) EDS spectra, and (d,e) EDS mapping of Ti and V elements for CP-TiCl<sub>4</sub> catalyst.

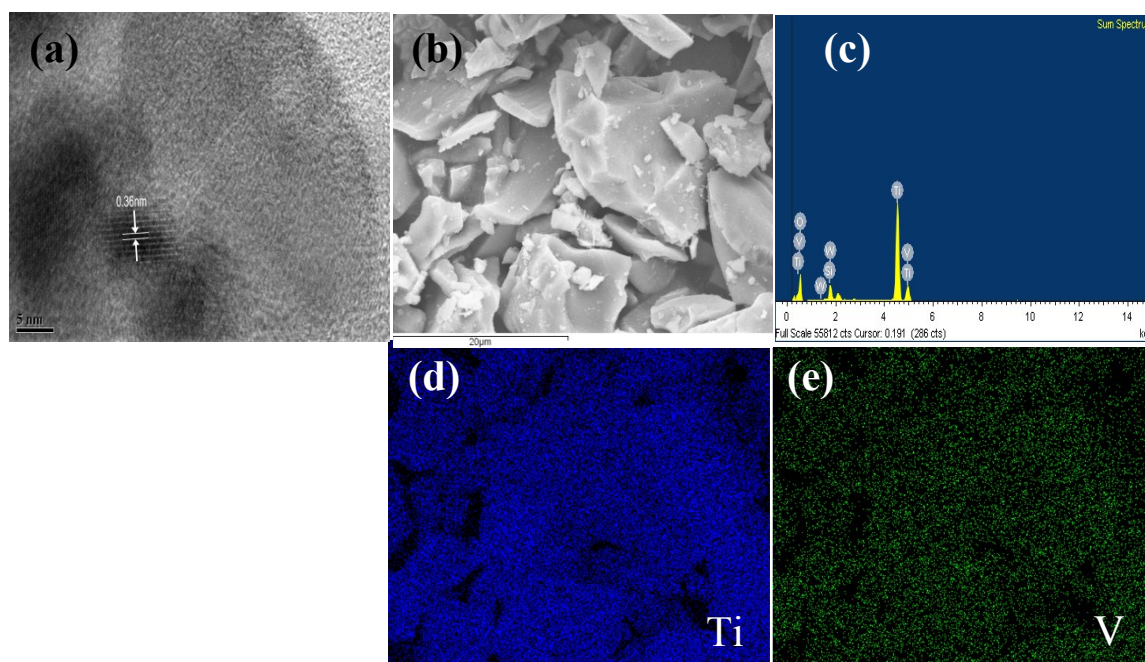

**Figure S5.** (a) HR-TEM image, (b) SEM image, (c) EDS spectra, and (d,e) EDS mapping of Ti, V elements for SG-Organic catalyst.

Figures S2-S5 presented HR-TEM images (a), SEM images (b), EDS spectra (c), and EDS mapping of Ti, V, Fe elements (d-f) for BFS-1, BFS-2, CP-TiCl<sub>4</sub> and SG-Organic catalysts, respectively. The HR-TEM images shown in Figure S2-S5 (a) demonstrated the presence of anatase TiO<sub>2</sub> in all the prepared catalysts by a d-spacing of 0.360 nm that corresponds to the (101) lattice fringes of anatase TiO<sub>2</sub> ( $d = 0.352$  nm, JCPDS No. 21-1272). The SEM images (S2.-S5 (b)) and their corresponding EDS spectra (S2-S5 (c)) further confirmed that these catalysts were composed of Ti, Si, V, W, O, Al, Fe elements. Furthermore, Figures S2-S5(c-e) suggested the incorporation of main active V into TiO<sub>2</sub> lattice and its high dispersion on the catalyst surface. For the slag-based catalysts, EDS mapping in Figures S2-S3 (f) indicated that the Fe element evenly dispersed on the scanning area, meaning the excellent distribution of Fe on the surface of slag-based catalysts. Also, one can conclude from the EDS mapping and spectra that ferric elements were not aggregated, which correlates with the lack of Fe<sub>2</sub>O<sub>3</sub> peak in the XRD pattern of supports (see Figure 2).
